# Supplementary material for: Ni/Co/Co3O4@C nanorods derived from a MOF@MOF hybrid for efficient overall water splitting
Source: Royal Society of Chemistry journal article supplement (doi:10.1039/d2nr05686k), 2022-12-12
Supplement: d2nr05686k1.pdf [file d2nr05686k1.pdf]

## Supplementary Information

# Ni/Co/Co<sub>3</sub>O<sub>4</sub>@C Nanorods Derived from MOF@MOF Hybrid for Efficient Overall Water Splitting

Dao Thi Dung,<sup>a,b,†</sup> Do Van Lam,<sup>a,†</sup> Euijin Roh,<sup>c</sup> Sanghyeon Ji<sup>d</sup>, Jong Min Yuk<sup>d</sup>, Jae-Hyun Kim,<sup>a,b</sup> Hyunuk Kim,<sup>b,c</sup> and Seung-Mo Lee<sup>a,b,\*</sup>

<sup>a</sup> Korea Institute of Machinery and Materials (KIMM), 156 Gajeongbuk-ro, Yuseong-gu, Daejeon 34103, South Korea.

<sup>b</sup> University of Science and Technology (UST), 217 Gajeong-ro, Yuseong-gu, Daejeon 34113, South Korea.

<sup>c</sup> Korea Institute of Energy Research (KIER), 152 Gajeong-ro, Yuseong-gu, Daejeon 34129, South Korea.

<sup>d</sup> Korea Advanced Institute of Science and Technology (KAIST), 291 Deahak-ro, Yuseong-gu, Deajeon, 34141, South Korea.

<sup>†</sup> These authors contributed equally to this work.

\* Corresponding author: Seung-Mo Lee (sm.lee@kimm.re.kr)

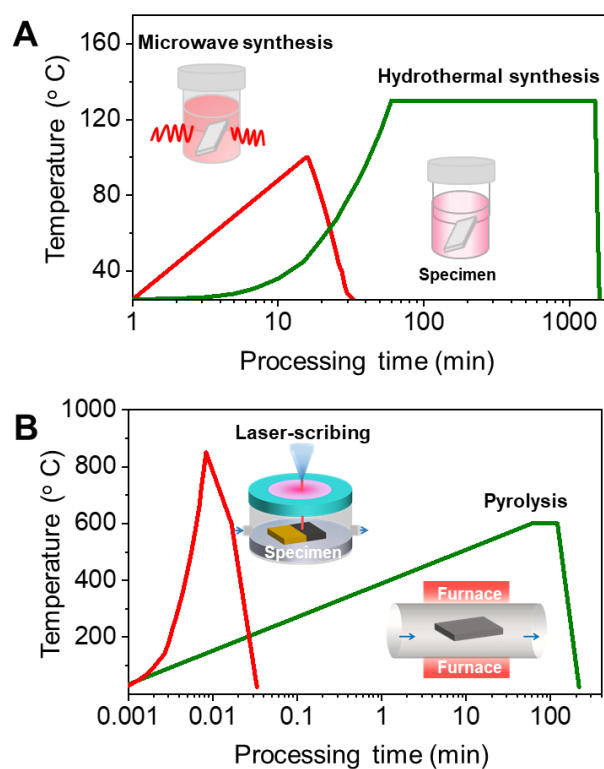

**Figure S1.** (A) The time-temperature profiles of the microwave and hydrothermal synthesis. The microwave synthesis of the Co/Ni-MOF nanorods on Ni foam was swiftly conducted for 2 min at 100 °C, whereas the hydrothermal synthesis of Co/Ni-MOF lasted for 24 h at 130 °C. (B) The time-temperature profiles of the laser-scribing and pyrolysis process. The pyrolysis took several hours in a furnace, whereas the laser-scribing took only a few seconds.

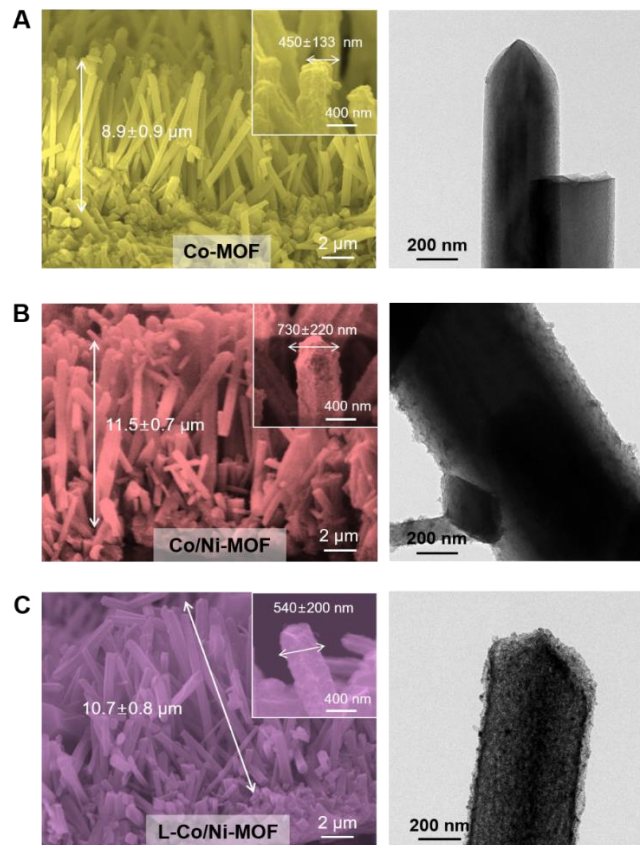

**Figure S2.** SEM and TEM images of (A) Co-MOF, (B) Co/Ni-MOF, and (C) L-Co/Ni-MOF.

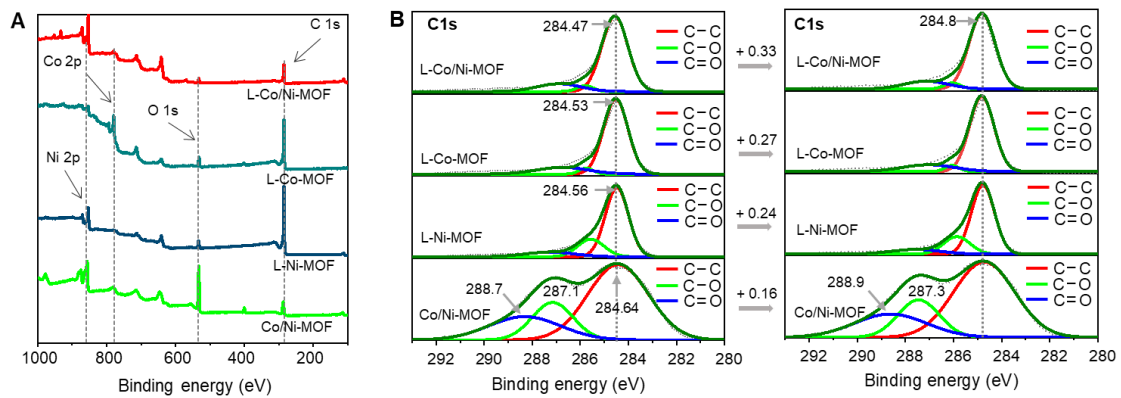

**Figure S3.** (A) XPS survey scan spectra of samples. (B) Deconvoluted C1s XPS spectra of samples before and after calibration. The C1s peak was used as a reference for the calibration, which was assumed to have a binding energy of 284.8 eV [S1, S2].

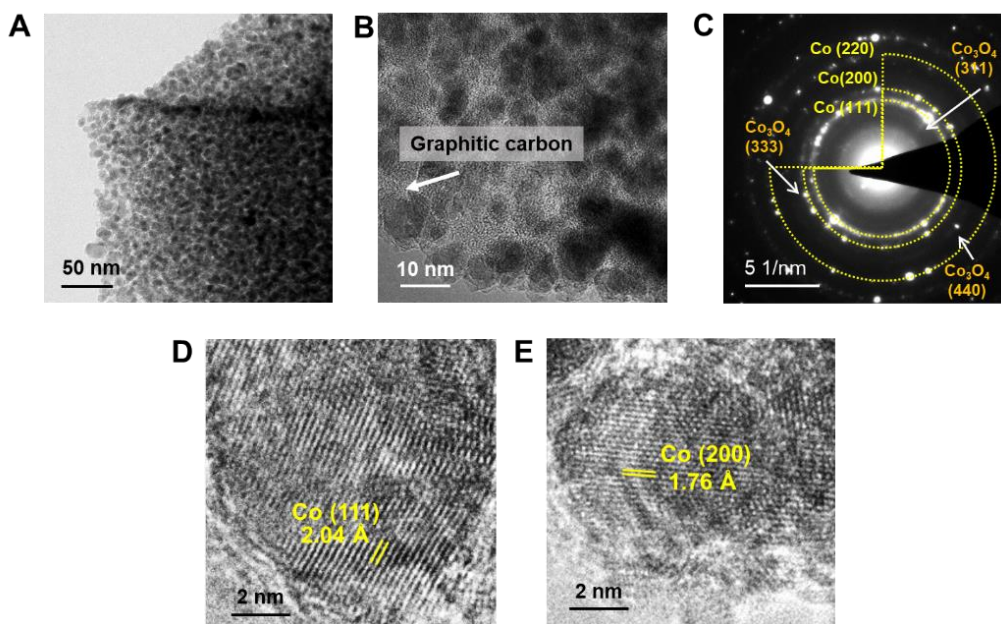

**Figure S4.** Phase and microstructure characteristics of the L-Co-MOF. (A, B) TEM images showing the microstructure of a representative L-Co-MOF nanorod. (C) SAED pattern. (D, E) HRTEM images showing the crystalline nanoparticles of Co with (111) and (200) planes.

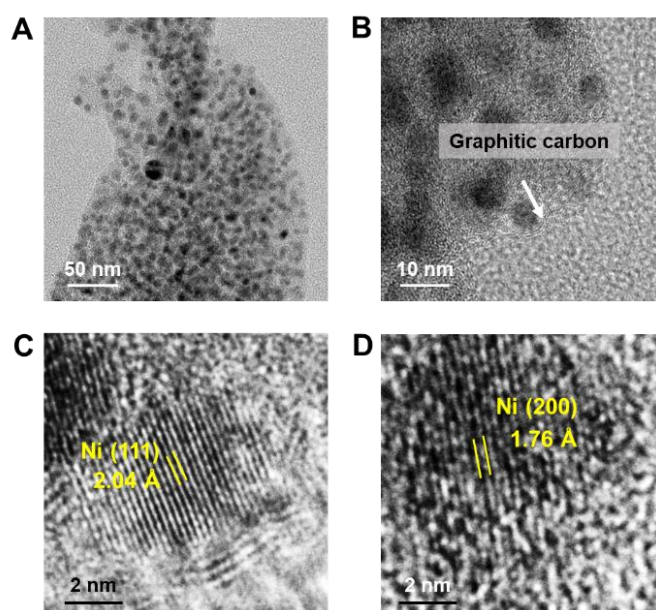

**Figure S5.** Phase and microstructure characteristics of the L-Ni-MOF. (A, B) TEM images showing the microstructure of a representative L-Ni-MOF nanorod. (C, D) HRTEM images showing the crystalline nanoparticles of Ni with (111) and (200) planes.

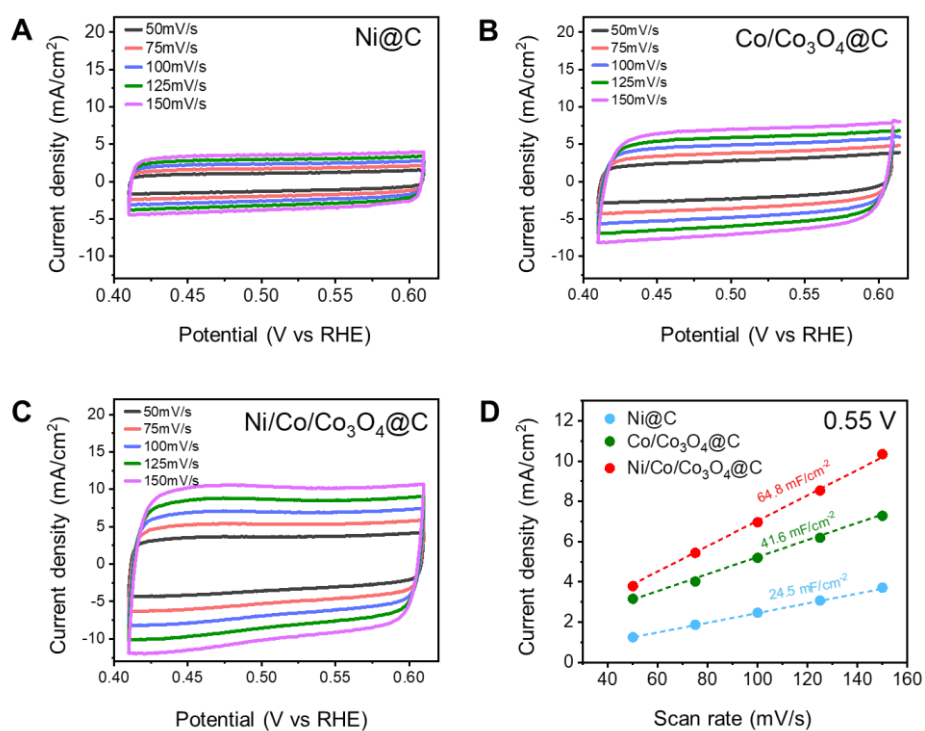

**Figure S6.** Cyclic voltammetry profiles of the samples at different scan rates in a non-Faradaic potential range of 0.41 - 0.61 V vs RHE. (A) Ni@C, (B) Co/Co<sub>3</sub>O<sub>4</sub>@C, and (C) Ni/Co/Co<sub>3</sub>O<sub>4</sub>@C. (D) A plot of current density vs scan rate at a potential of 0.55 V vs RHE.

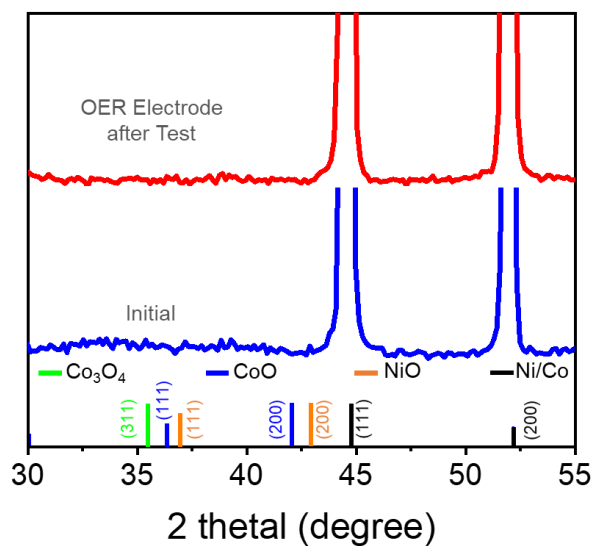

**Figure S7.** XRD patterns of the Ni/Co/Co<sub>3</sub>O<sub>4</sub>@C before and after the OER.

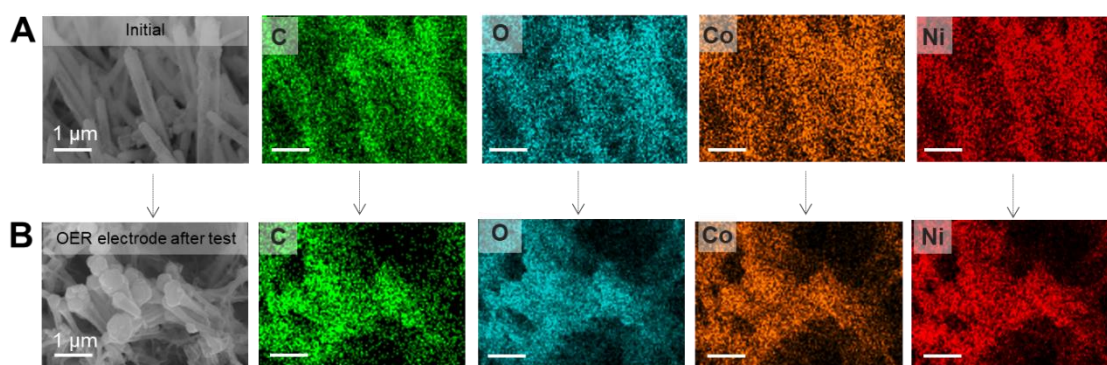

**Figure S8.** SEM-EDX mapping and elemental analysis of the Ni/Co/Co<sub>3</sub>O<sub>4</sub>@C (A) before and (B) after the OER.

**Table S1.** The elemental composition of the samples evaluated by SEM-EDX analysis.

| Sample                                  | Elemental composition |         |          |          |
|-----------------------------------------|-----------------------|---------|----------|----------|
|                                         | C [wt%]               | O [wt%] | Ni [wt%] | Co [wt%] |
| Co-MOF                                  | 55.57                 | 23.77   | 0        | 20.66    |
| Ni-MOF                                  | 46.35                 | 28.13   | 25.52    | 0        |
| Co/Ni-MOF                               | 36.95                 | 22.52   | 19.14    | 21.39    |
| Co/Co <sub>3</sub> O <sub>4</sub> @C    | 45.68                 | 9.48    | 0        | 44.84    |
| Ni@C                                    | 54.84                 | 4.67    | 40.49    | 0        |
| Ni/Co/Co <sub>3</sub> O <sub>4</sub> @C | 45.14                 | 8.86    | 21.36    | 24.64    |

**Table S2.** Comparison of electrocatalytic performances of various bifunctional electrocatalysts.

| Sample                                  | OER overpotential                  |                                     | HER overpotential                  |                                     | Water splitting voltage           | Durability<br>[%@h] | Ref.      |
|-----------------------------------------|------------------------------------|-------------------------------------|------------------------------------|-------------------------------------|-----------------------------------|---------------------|-----------|
|                                         | @ 30<br>mA/cm <sup>2</sup><br>[mV] | @ 100<br>mA/cm <sup>2</sup><br>[mV] | @ 30<br>mA/cm <sup>2</sup><br>[mV] | @ 100<br>mA/cm <sup>2</sup><br>[mV] | @ 20<br>mA/cm <sup>2</sup><br>[V] |                     |           |
| Ni/Co/Co <sub>3</sub> O <sub>4</sub> @C | 246                                | 350                                 | 143                                | 224                                 | 1.6                               | 91.6@24             | This work |
| Ni <sub>3</sub> Se <sub>4</sub>         | 231                                | 255                                 | 175                                | 300                                 | 1.55                              | 100@8               | S3        |
| FeNiP/P-G                               | 245                                | 291                                 | 200                                | 225                                 | 1.63                              | 100@20              | S4        |
| FeMn-MOF                                | 265                                | 364                                 | 215                                | 330                                 | 1.57                              | 90@12               | S5        |
| Co-S-Mo                                 | 295                                | 322                                 | 230                                | 290                                 | 1.72                              | 88.2@25             | S6        |
| FeNiSe <sub>2</sub>                     | 270                                | 333                                 | 425                                | 240                                 | 1.64                              | 70@6                | S7        |
| Co/Ni-MOF@Se                            | 291                                | -                                   | 325                                | 340                                 | 1.66                              | 98@20               | S8        |
| NiCoP                                   | 270                                | 346                                 | 120                                | 175                                 | 1.56                              | 94@11               | S9        |
| FeNi <sub>3</sub> /NiFeO <sub>x</sub>   | 270                                | -                                   | 175                                | -                                   | 1.66                              | 75@2.5              | S10       |
| Ni-Co-P hollow                          | 215                                | 346                                 | 215                                | 265                                 | 1.71                              | 93.4@20             | S11       |
| CoFeP hollow                            | 370                                | -                                   | 225                                | -                                   | 1.6                               | 90@12               | S12       |

### Supporting references

- [S1]. G. Greczynski and L. Hultman, Compromising science by ignorant instrument calibration-need to revisit half a century of published XPS data. *Angew. Chemie. Int. Ed.*, 2020, **59**, 5002–5006.
- [S2]. S. D. Fang, F. He, J. Xie and L. Xue, Calibration of binding energy positions with C1s for XPS results. *J. Wuhan Univ. Technol. Mater. Sci. Ed.*, 2020, **35**, 711–718.
- [S3]. S. Anantharaj, J. Kennedy and S. Kundu, Microwave-initiated facile formation of Ni<sub>3</sub>Se<sub>4</sub> nanoassemblies for enhanced and stable water splitting in neutral and alkaline media. *ACS Appl. Mater. Interfaces.*, 2017, **9**, 8714–8728.
- [S4]. F. Bu, W. Chen, M. F. Aly Aboud, I. Shakir, J. Gu and Y. Xu, Microwave-assisted ultrafast synthesis of adjustable bimetal phosphide/graphene heterostructures from MOFs for efficient electrochemical water splitting. *J. Mater. Chem. A.*, 2019, **7**, 14526–14535.
- [S5]. H. Guan, N. Wang, X. Feng, S. Bian, W. Li and Y. Chen, FeMn bimetallic MOF directly

- applicable as an efficient electrocatalyst for overall water splitting. *Colloids Surf. A Physicochem. Eng. Asp.*, 2021, **624**, 126596.
- [S6]. S. Shit, W. Jang, S. Bolar, N. C. Murmu, H. Koo and T. Kuila, Effect of ion diffusion in cobalt molybdenum bimetallic sulfide toward electrocatalytic water splitting. *ACS Appl. Mater. Interfaces*, 2019, **11**, 21634–21644.
- [S7]. K. C. Majhi and M. Yadav, Bimetallic chalcogenide nanocrystallites as efficient electrocatalyst for overall water splitting. *J. Alloys Compd.*, 2021, **852**, 156736.
- [S8]. P. Luo, Z. Pang, Z. Qin, T. Wei, S. Li, Y. Hu and C. Wei, Strategies for improving Co/Ni-based bimetal-organic framework to water splitting. *Int. J. Hydrogen Energy*, 2020, **45**, 28240–28251.
- [S9]. C. Du, L. Yang, F. Yang, G. Cheng and W. Luo, Nest-like NiCoP for highly efficient overall water splitting. *ACS Catal.*, 2017, **7**, 4131–4137.
- [S10]. X. Yan, L. Tian, K. Li, S. Atkins, H. Zhao, J. Murowchick, L. Liu and X. Chen, FeNi<sub>3</sub>/NiFeO<sub>x</sub> nanohybrids as highly efficient bifunctional electrocatalysts for overall water splitting. *Adv. Mater. Interfaces*, 2016, **3**, 1600368.
- [S11]. [S11] E. Hu, Y. Feng, J. Nai, D. Zhao, Y. Hu and X. W. Lou, Construction of hierarchical Ni–Co–P hollow nanobricks with oriented nanosheets for efficient overall water splitting. *Energy Environ. Sci.*, 2018, **11**, 872–880.
- [S12]. Y. Du, H. Qu, Y. Liu, Y. Han, L. Wang and B. Dong, Bimetallic CoFeP hollow microspheres as highly efficient bifunctional electrocatalysts for overall water splitting in alkaline media. *Appl. Surf. Sci.*, 2019, **465**, 816–823.
